# Supplementary material for: Novel Polyelectrolytes Based on Naphthalene Diimide with Different Counteranions for Cathode Interlayers in Polymer Solar Cells
Source: MDPI journal article supplement (doi:10.3390/ijms25010522), 2023-12-30
Supplement: s1 [file s1]

# Supporting Information

## Novel Polyelectrolytes Based on Naphthalene Diimide with Different Counteranions for Cathode Interlayers in Polymer Solar Cells

Rahmatia Fitri Binti Nasrun <sup>1,2,†</sup>, Dong Hwan Son <sup>1,2,†</sup> and Joo Hyun Kim <sup>1,2,\*</sup>

<sup>1</sup> Department of Polymer Engineering, Pukyong National University, Busan 48513, Republic of Korea;

rahmatiaf@pukyong.ac.kr (R.F.B.N.); ehdghks507@naver.com (D.H.S.)

<sup>2</sup> CECS Research Institute, Core Research Institute, Busan 48513, Republic of Korea.

\* Correspondence: jkim@pku.ac.kr

† These authors contributed equally to this work.

Keywords: polyelectrolytes; cathode interlayer; naphthalene diimide; polymer solar cell

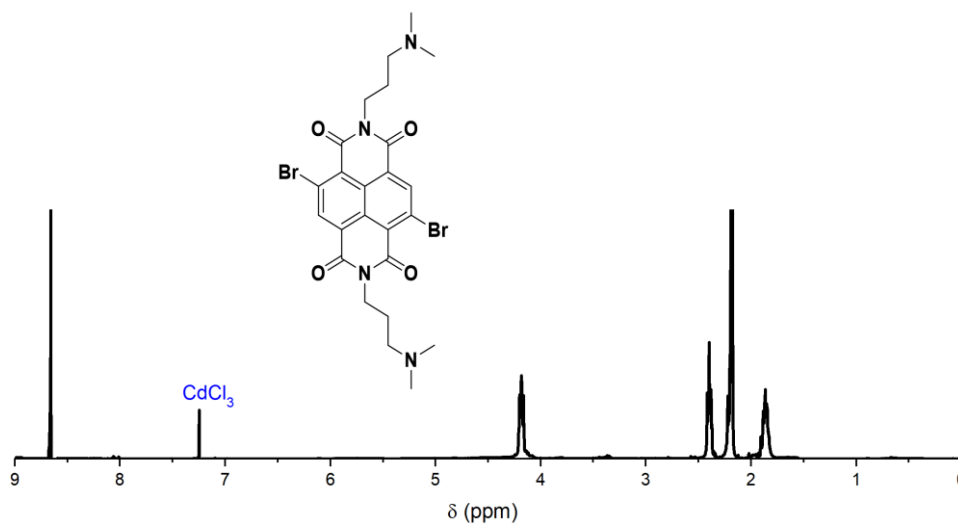

Figure S1. <sup>1</sup>H spectra of compound 2.

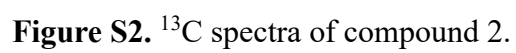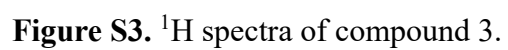

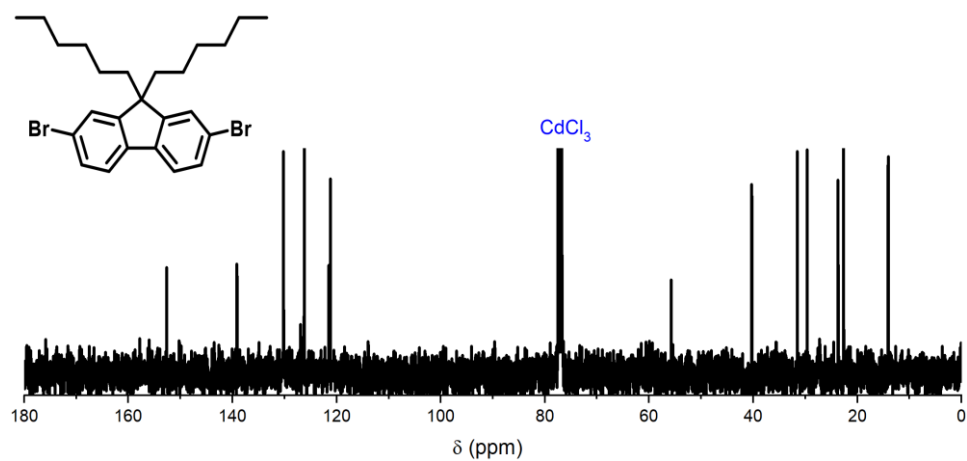

**Figure S4.**  $^{13}\text{C}$  spectra of compound 3.

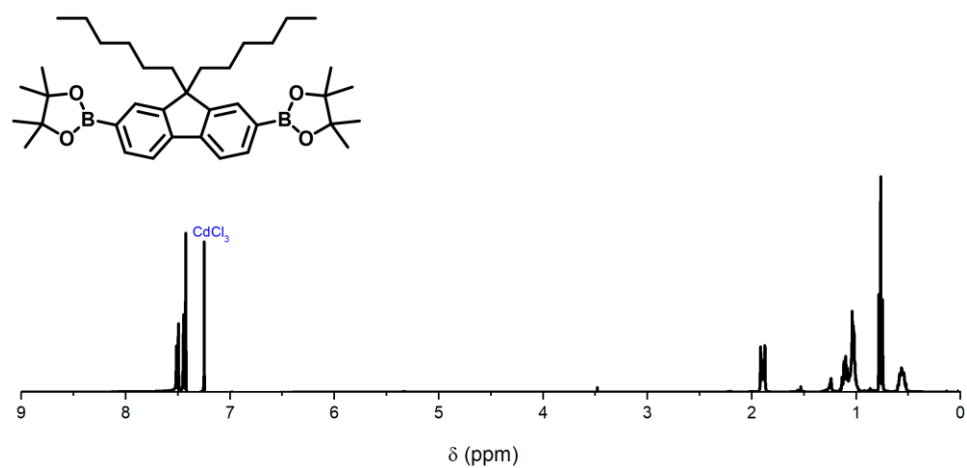

**Figure S5.**  $^1\text{H}$  spectra of compound 4.

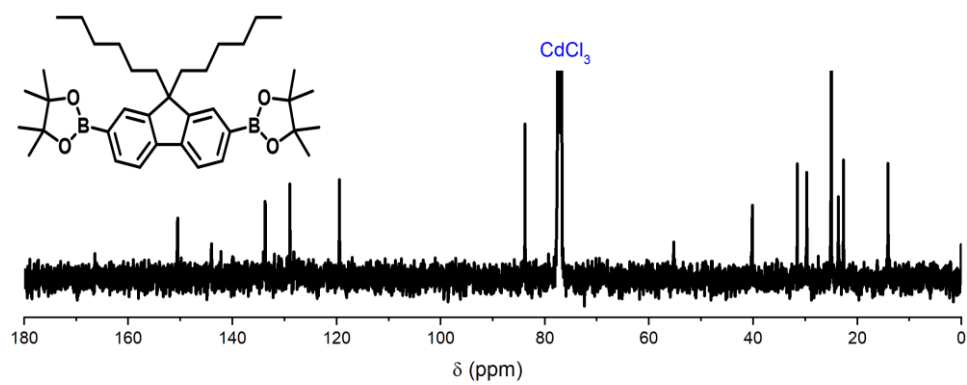

**Figure S6.**  $^{13}\text{C}$  spectra of compound 4.

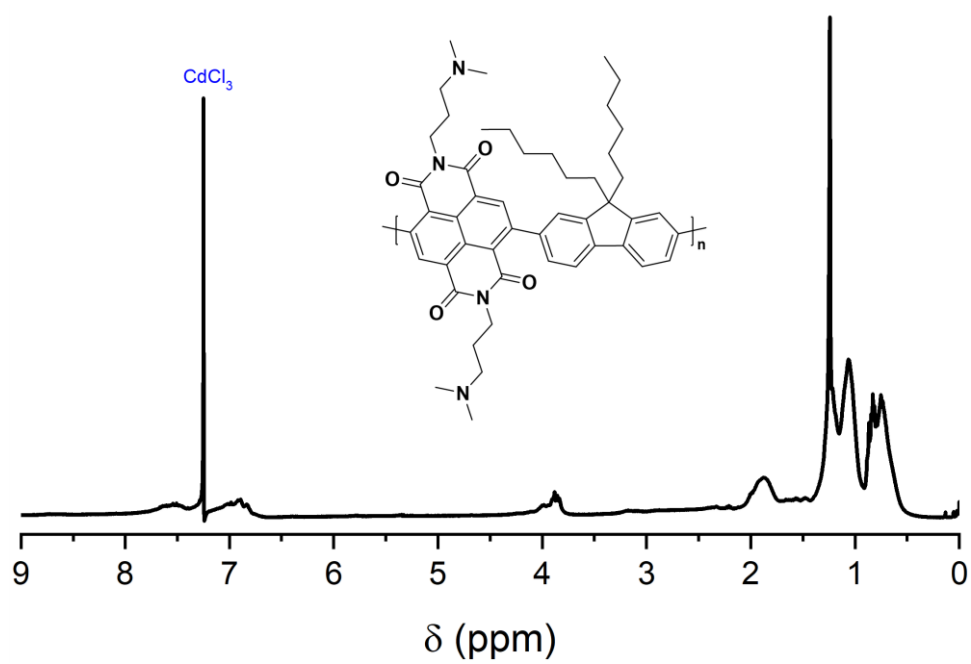

**Figure S7.**  $^1\text{H}$  spectra of PF-NDIN.

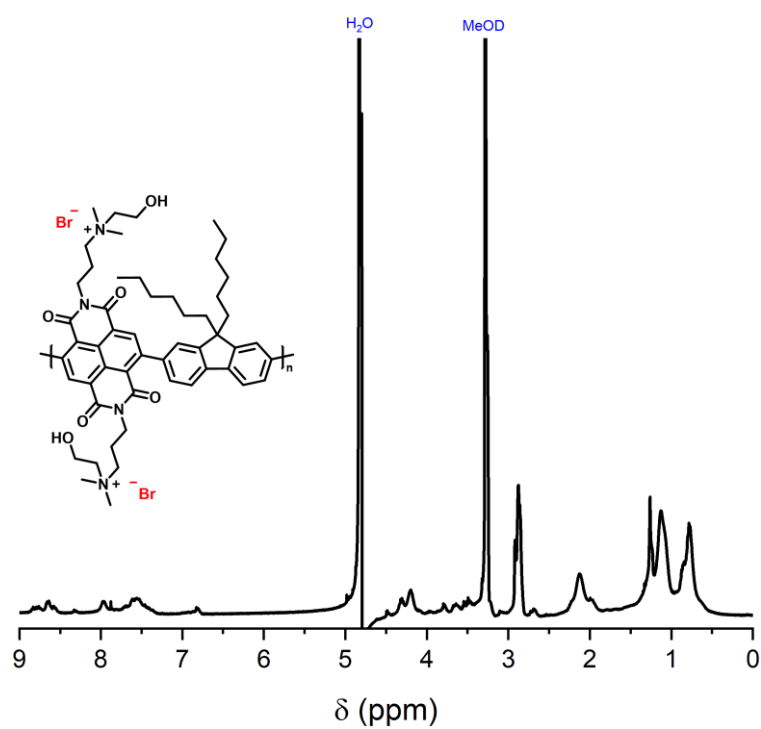

**Figure S8.**  $^1\text{H}$  spectra of PF-NDIN-Br-OH.

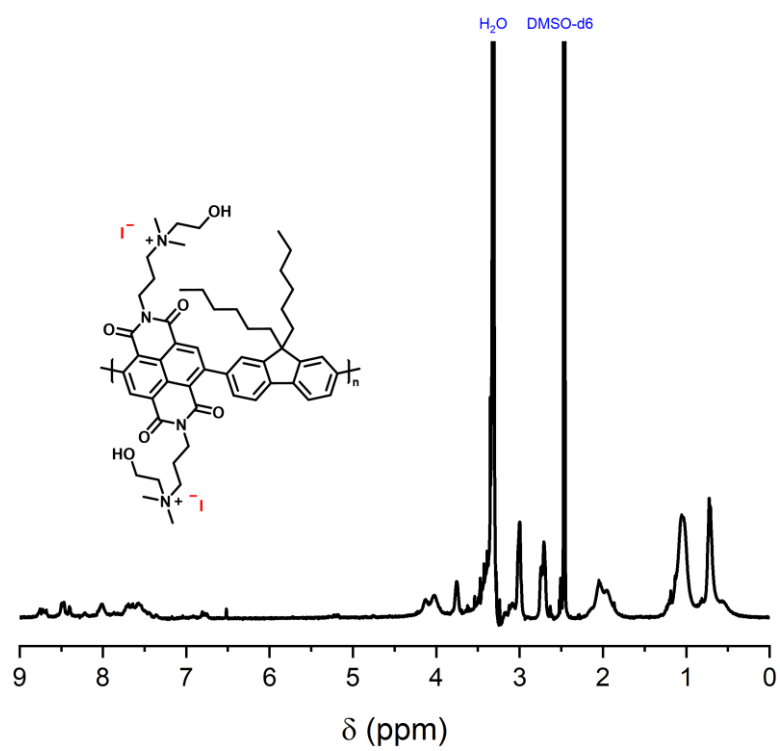

**Figure S9.**  $^1\text{H}$  spectra of PF-NDIN-I-OH.

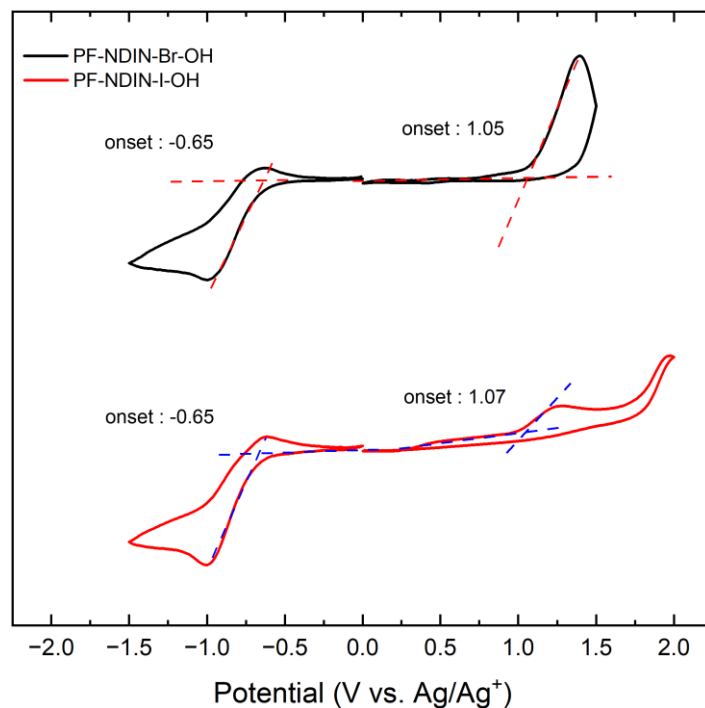

**Figure S10.** Cyclic voltammogram of polyelectrolytes.

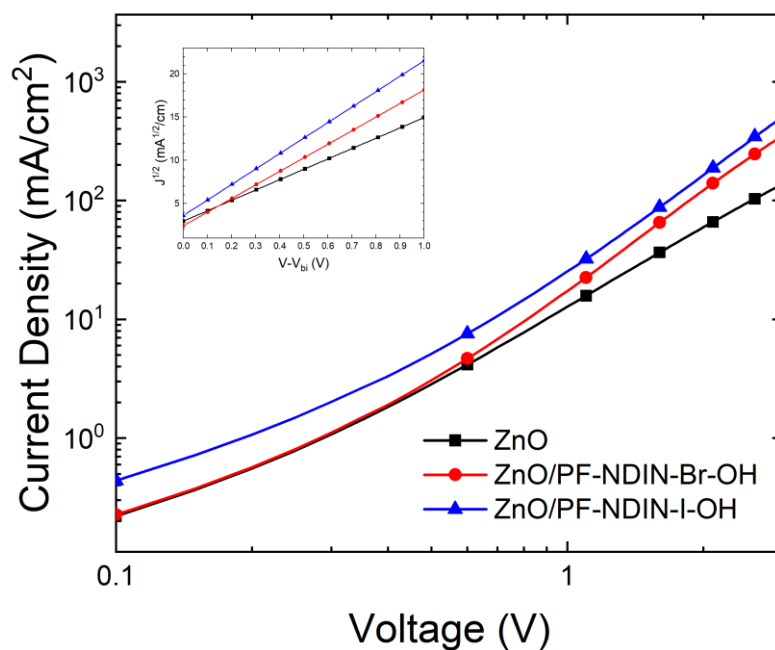

**Figure S11.** Current density–voltage curves of the electron-only devices with fitted line ( $V$ , applied voltage;  $V_{bi}$ , built-in voltage).

**Table S1.** The list of abbreviations in the paper

| Word                                                                                                                                 | Abbreviations       |
|--------------------------------------------------------------------------------------------------------------------------------------|---------------------|
| Polymer solar cells                                                                                                                  | PSCs                |
| Power conversion efficiency                                                                                                          | PCE                 |
| Short-circuit current                                                                                                                | $J_{sc}$            |
| Open-circuit voltage                                                                                                                 | $V_{oc}$            |
| Fill factor                                                                                                                          | $FF$                |
| Lowest unoccupied molecular orbital                                                                                                  | LUMO                |
| Highest occupied molecular orbital                                                                                                   | HOMO                |
| Poly([2,6'-4,8-di(5-ethylhexylthienyl)benzo[1,2-b;3,3-b]dithiophene]{3-fluoro-2[(2-ethylhexyl)carbonyl]thieno[3,4-b]thiophenediyl})) | PTB7-Th             |
| (6,6)-Phenyl C71 butyric acid methyl ester                                                                                           | PC <sub>71</sub> BM |
| Ultraviolet–visible                                                                                                                  | UV–Vis              |
| Intramolecular charge transfer                                                                                                       | ICT                 |
| Cyclic voltammogram                                                                                                                  | CV                  |
| Work function                                                                                                                        | WF                  |
| Incident photon-to-current efficiency                                                                                                | IPCE                |
| Series resistance                                                                                                                    | $R_s$               |
| Shunt resistance                                                                                                                     | $R_{sh}$            |
| Photocurrent density                                                                                                                 | $J_{ph}$            |
| Effective voltage                                                                                                                    | $V_{eff}$           |
| Saturated photocurrent regime                                                                                                        | $V_{sat}$           |
| Saturation current density                                                                                                           | $J_{sat}$           |
| Maximum exciton generation rate                                                                                                      | $G_{max}$           |

|                                        |             |
|----------------------------------------|-------------|
| Electron charge                        | $q$         |
| Thickness of the active layer          | $L$         |
| Electron mobility                      | $\mu_e$     |
| Light intensity                        | $P_{light}$ |
| Electrochemical impedance spectroscopy | EIS         |
| Recombination resistance               | $R_{rec}$   |

---
